# Supplementary material for: Genome-Wide Identification, Expression Analysis, and Subcellular Localization of Carthamus tinctorius bHLH Transcription Factors
Source: PubMed Central journal article supplement (PMC6627405; doi:10.3390/ijms20123044), 2019-06-21
Supplement: ijms-20-03044-s001.pdf [file ijms-20-03044-s001.pdf]

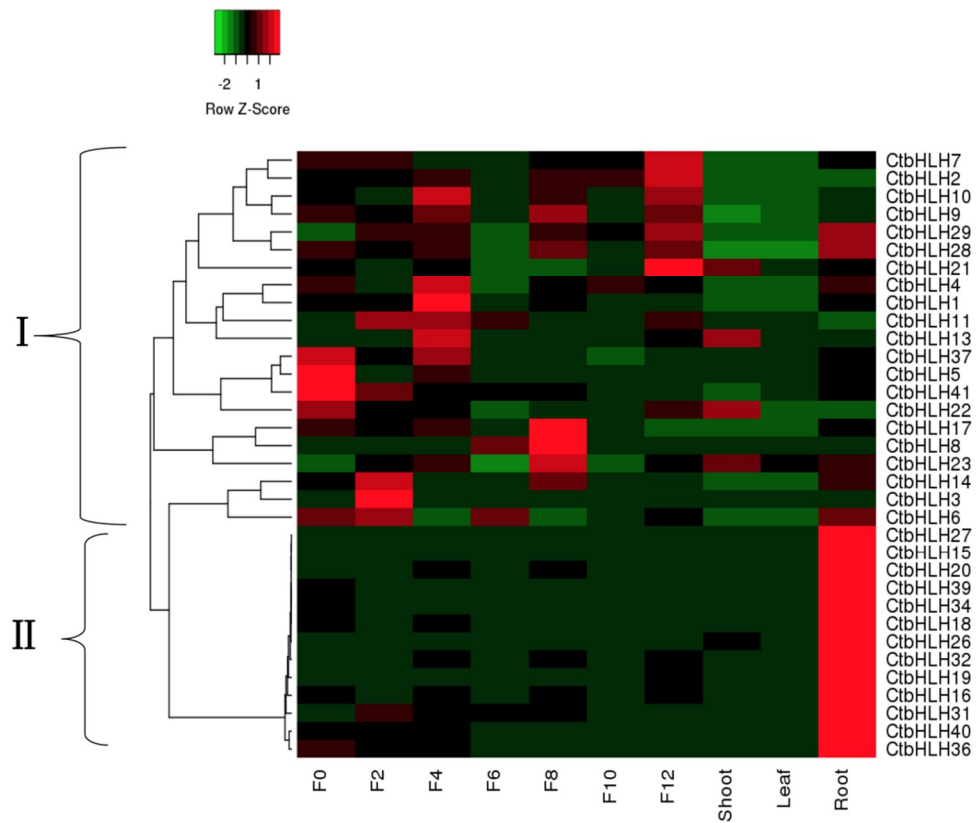

**Figure S1.** Schematic pattern of tissue-specific gene expression of *Carthamus tinctorius* Bhlh members. Four tissues, including roots, shoots, leaves, and 0-, 2-, 4-, 6-, 8-, 10-, and 12-day old petals were determined. The scale bars represent the log<sub>2</sub> transformations of the RPKM values.
